# Supplementary material for: Influence of Warming and Atmospheric Circulation Changes on Multidecadal European Flood Variability
Source: Copernicus journal article supplement (doi:10.5194/cp-2021-160), 2021-12-03
Supplement: Supplementary file 1 [file cp-2021-160-supplement.zip]

# **Influence of Warming and Atmospheric Circulation Changes on Multidecadal European Flood Variability**

Stefan Brönnimann,<sup>1,2</sup> Peter Stucki,<sup>1,2</sup> Jörg Franke,<sup>1,2</sup> Veronika Valler,<sup>1,2</sup> Yuri Brugnara,<sup>1,2</sup> Ralf Hand,<sup>1,2</sup> Laura C. Slivinski,<sup>3,4</sup> Gilbert P. Compo,<sup>3,4</sup> Prashant D. Sardeshmukh,<sup>3,4</sup> Michel Lang,<sup>5</sup> Bettina Schaepli<sup>1,2</sup>

<sup>1</sup> Oeschger Centre for Climate Change Research, University of Bern, Switzerland

<sup>2</sup> Institute of Geography, University of Bern, Switzerland

<sup>3</sup> University of Colorado, CIRES, Boulder, USA

<sup>4</sup> NOAA Physical Sciences Laboratory, Boulder, USA

<sup>5</sup> INRAE, Lyon-Villeurbanne, France

**Supplementary Table S1**

**Supplementary Figures S1, S2, S3, S4 S5**

## Supplementary Tables

**Supplementary Table S1:** Streamflow series used in the paper with their hydrological characteristics, as well as the precipitation station used for comparison. The 14 long series shown in Fig. 1 are in highlighted bold

| GRDC station number | river name     | station name          | Cluster # | country code (ISO 3166) | latitude, decimal degree | longitude, decimal degree | catchment size, km2 | height of gauge zero, m above sea level | data available from year | data available until year | long-term average discharge, cubic kilometre per second | Precipitation station | latitude, decimal degree | longitude, decimal degree |
|---------------------|----------------|-----------------------|-----------|-------------------------|--------------------------|---------------------------|---------------------|-----------------------------------------|--------------------------|---------------------------|---------------------------------------------------------|-----------------------|--------------------------|---------------------------|
| 6935300             | Aare           | Untersiggental/Stilli |           | CH                      | 47.5166                  | 8.2348                    | 17601               | 373.41                                  | 1904                     | 2016                      | 558.2                                                   | Bern                  | 46.99                    | 7.46                      |
| 6337502             | Aller          | Celle                 |           | DE                      | 52.622                   | 10.063                    | 4374                | 31.8                                    | 1890                     | 2016                      | 27.0                                                    | Clausthal             | 51.79                    | 10.35                     |
| 6731215             | Bjerkreimselva | Bjerkreim             |           | NO                      | 58.58                    | 6.08                      | 633                 | 55                                      | 1897                     | 2015                      | 50.9                                                    | Soyland               | 58.68                    | 5.98                      |
| 6142200             | Danube         | Achleiten             |           | DE                      | 48.5824                  | 13.5044                   | 76653               | 287.7                                   | 1900                     | 2015                      | 1421.1                                                  | Passau                | 48.58                    | 13.42                     |
| 6342800             | Danube         | Bratislava            |           | SK                      | 48.1396                  | 17.1092                   | 131331              | 128                                     | 1900                     | 2017                      | 2045.5                                                  | Vienna                | 48.23                    | 16.35                     |
| 6342900             | Danube         | Hofkirchen            |           | DE                      | 48.6766                  | 13.1152                   | 47496               | 299.6                                   | 1900                     | 2016                      | 636.9                                                   | Munich                | 48.17                    | 11.5                      |
| 6140700             | Divoka Orlice  | Nekor                 |           | CZ                      | 50.0651                  | 16.5404                   | 182.4               | 431.19                                  | 1906                     | 2018                      | 3.7                                                     | Görlitz               | 51.16                    | 14.95                     |
| 6340120             | Elbe           | Barby                 |           | DE                      | 51.9901                  | 11.8826                   | 94060               | 46                                      | 1899                     | 2016                      | 551.3                                                   | Jena                  | 50.93                    | 11.58                     |
| 6340110             | Elbe           | Decin                 |           | CZ                      | 50.7822                  | 14.2096                   | 51120.3             | 120.07                                  | 1887                     | 2018                      | 309.3                                                   | Prague                | 50.09                    | 14.42                     |
| <b>6140400</b>      | <b>Elbe</b>    | <b>Dresden</b>        |           | <b>DE</b>               | <b>51.0597</b>           | <b>13.7385</b>            | <b>53096</b>        | <b>102.73</b>                           | <b>1806</b>              | <b>2016</b>               | <b>332.2</b>                                            | <b>Chemnitz</b>       | 50.79                    | 12.87                     |
| <b>6340140</b>      | <b>Elbe</b>    | <b>Neu-Darchau</b>    |           | <b>DE</b>               | <b>53.2323</b>           | <b>10.8888</b>            | <b>131950</b>       | <b>5.68</b>                             | <b>1874</b>              | <b>2016</b>               | <b>705.9</b>                                            | <b>Marnitz</b>        | 53.32                    | 11.93                     |
| 6340150             | Elbe           | Wittenberge           |           | DE                      | 52.9908                  | 11.7598                   | 123532              | 17                                      | 1899                     | 2016                      | 677.2                                                   | Berlin                | 52.46                    | 13.3                      |
| 6338120             | Ems            | Greven                |           | DE                      | 52.094                   | 7.603                     | 2842                | 32.71                                   | 1900                     | 2016                      | 26.1                                                    | Münster               | 51.95                    | 7.59                      |
| 6731403             | Glomma         | Solbergfoss           |           | NO                      | 59.6373                  | 11.1535                   | 40540               | 101                                     | 1901                     | 2013                      | 690.6                                                   | Orje                  | 59.48                    | 11.65                     |
| 6342200             | Iller          | Kempton               |           | DE                      | 47.7304                  | 10.3169                   | 954.6               | 656                                     | 1900                     | 2016                      | 46.4                                                    | Kempton               | 47.72                    | 10.34                     |
| 6342830             | Ilz            | Kalteneck             |           | DE                      | 48.6889                  | 13.4519                   | 762                 | 327.97                                  | 1900                     | 2016                      | 16.1                                                    | Riedlhütte            | 48.89                    | 13.43                     |
| 6343100             | Inn            | Martinsbruck          |           | CH                      | 46.8858                  | 10.4654                   | 1945                | 1076.537                                | 1904                     | 2016                      | 55.9                                                    | Bever                 | 46.5                     | 9.85                      |
| 6943100             | Inn            | Wasserburg            |           | DE                      | 48.0593                  | 12.2342                   | 11983               | 420.45                                  | 1826                     | 2016                      | 354.2                                                   | Ebersberg             | 48.1                     | 11.99                     |
| <b>6607830</b>      | <b>Lea</b>     | <b>Feildes Weir</b>   |           | <b>GB</b>               | <b>51.7642</b>           | <b>0.0139</b>             | <b>1036</b>         | <b>27.7</b>                             | <b>1879</b>              | <b>2018</b>               | <b>4.4</b>                                              | <b>Rothamsted</b>     | 51.81                    | 0.36                      |
| 6342513             | Lech           | Landsberg             |           | DE                      | 48.0415                  | 10.8751                   | 2295                | 584.41                                  | 1900                     | 2016                      | 82.4                                                    | Hohenpeissenberg      | 47.8                     | 11.01                     |
| <b>6335500</b>      | <b>Main</b>    | <b>Schweinfurt</b>    |           | <b>DE</b>               | <b>50.0312</b>           | <b>10.2208</b>            | <b>12715</b>        | <b>201.16</b>                           | <b>1844</b>              | <b>2016</b>               | <b>103.2</b>                                            | <b>Bamberg</b>        | 49.88                    | 10.92                     |
| <b>6335301</b>      | <b>Main</b>    | <b>Würzburg</b>       |           | <b>DE</b>               | <b>49.796</b>            | <b>9.926</b>              | <b>14031</b>        | <b>164.55</b>                           | <b>1823</b>              | <b>2016</b>               | <b>108.9</b>                                            | <b>Bamberg</b>        | 49.88                    | 10.92                     |
| 6336050             | Moselle        | Cochem                |           | DE                      | 50.1434                  | 7.1683                    | 27088               | 77                                      | 1900                     | 2016                      | 313.8                                                   | Karlsruhe             | 49.04                    | 8.36                      |

|                      |                |                          |  |           |                |                |               |                |             |             |               |                     |       |       |
|----------------------|----------------|--------------------------|--|-----------|----------------|----------------|---------------|----------------|-------------|-------------|---------------|---------------------|-------|-------|
| 6731217              | Ognaelvi       | Helleland                |  | NO        | 58.5336        | 6.1503         | 185           | 86             | 1896        | 2015        | 13.7          | Soyland             | 58.68 | 5.98  |
| 6935310              | Reuss          | Mellingen                |  | CH        | 47.421         | 8.2713         | 3382          | 392.631        | 1904        | 2016        | 139.2         | Engelberg           | 46.8  | 8.4   |
| <b>not from GRDC</b> | <b>Rhine</b>   | <b>Basel/Schifflande</b> |  | <b>CH</b> | <b>47.5599</b> | <b>7.5884</b>  | <b>35905</b>  | <b>292.887</b> | <b>1808</b> | <b>1995</b> | <b>1042.4</b> | <b>Basel</b>        | 47.53 | 7.58  |
| 6935051              | Rhine          | Domat/Ems                |  | CH        | 46.8377        | 9.4561         | 3229          | 622.884        | 1899        | 2016        | 117.4         | Bad Ragaz           | 47    | 9.5   |
| 6935052              | Rhine          | Düsseldorf               |  | DE        | 51.2255        | 6.7702         | 147680        | 24.48          | 1900        | 2016        | 2126.9        | Karlsruhe           | 49.04 | 8.36  |
| <b>6935145</b>       | <b>Rhine</b>   | <b>Köln</b>              |  | <b>DE</b> | <b>50.937</b>  | <b>6.9633</b>  | <b>144232</b> | <b>34.97</b>   | <b>1816</b> | <b>2016</b> | <b>2085.4</b> | <b>Karlsruhe</b>    | 49.04 | 8.36  |
| 6335050              | Rhine          | Lobith                   |  | NL        | 51.84          | 6.11           | 160800        | 8.53           | 1901        | 2017        | 2214.1        | Roermond            | 51.18 | 5.97  |
| 6435060              | Rhine          | Neuhausen                |  | CH        | 47.6823        | 8.6259         | 11887         | 429.577        | 1904        | 2016        | 369.4         | St. Gallen          | 47.4  | 9.4   |
| <b>6935054</b>       | <b>Rhine</b>   | <b>Rees</b>              |  | <b>DE</b> | <b>51.7569</b> | <b>6.3954</b>  | <b>159300</b> | <b>8</b>       | <b>1814</b> | <b>2016</b> | <b>2252.0</b> | <b>Roermond</b>     | 51.18 | 5.97  |
| 6935055              | Rhine          | Rekingen                 |  | CH        | 47.5704        | 8.33           | 14718         | 370.174        | 1904        | 2016        | 441.2         | Zurich              | 47.38 | 8.57  |
| <b>not from GRDC</b> | <b>Rhône</b>   | <b>Beaucaire</b>         |  | <b>FR</b> | <b>43.92</b>   | <b>4.67</b>    | <b>95590</b>  | <b>3</b>       | <b>1816</b> | <b>2017</b> | <b>1692.6</b> | <b>Montélimar</b>   | 44.58 | 4.73  |
| 6939200              | Rhône          | Chancy                   |  | CH        | 46.153         | 5.9707         | 10323         | 388.729        | 1904        | 2016        | 340.6         | Geneva              | 46.2  | 6.15  |
| 6939050              | Rhône          | Porte-du-Scex            |  | CH        | 46.3495        | 6.8886         | 5244          | 428.582        | 1905        | 2016        | 180.6         | Sion                | 46.22 | 7.33  |
| 6343560              | Saalach        | Unterjettenberg          |  | DE        | 47.6812        | 12.8228        | 927.3         | 494            | 1900        | 2016        | 38.2          | Schneizlreuth       | 47.67 | 12.77 |
| <b>6343500</b>       | <b>Salzach</b> | <b>Burghausen</b>        |  | <b>DE</b> | <b>48.1586</b> | <b>12.8343</b> | <b>6649</b>   | <b>352</b>     | <b>1826</b> | <b>2016</b> | <b>258.8</b>  | <b>Kremsmünster</b> | 48.06 | 14.13 |
| <b>6607651</b>       | <b>Thames</b>  | <b>Kingston</b>          |  | <b>GB</b> | <b>51.4154</b> | <b>-0.3077</b> | <b>9948</b>   | <b>4.7</b>     | <b>1883</b> | <b>2018</b> | <b>78.9</b>   | <b>Oxford</b>       | 51.76 | -1.26 |
| 6935400              | Thur           | Andelfingen              |  | CH        | 47.5965        | 8.682          | 1696          | 402.751        | 1904        | 2016        | 46.9          | Säntis              | 47.25 | 9.35  |
| 6731371              | Tovdalselva    | Flaksvatn                |  | NO        | 58.3305        | 8.2031         | 1780.6        | 19             | 1899        | 2014        | 61.0          | Mestad              | 58.22 | 7.89  |
| <b>6337100</b>       | <b>Weser</b>   | <b>Bodenwerder</b>       |  | <b>DE</b> | <b>51.973</b>  | <b>9.516</b>   | <b>15924</b>  | <b>69.39</b>   | <b>1839</b> | <b>2016</b> | <b>145.6</b>  | <b>Göttingen</b>    | 51.56 | 9.85  |
| <b>6337400</b>       | <b>Weser</b>   | <b>Hann. Münden</b>      |  | <b>DE</b> | <b>51.426</b>  | <b>9.641</b>   | <b>12442</b>  | <b>114.95</b>  | <b>1831</b> | <b>2016</b> | <b>109.8</b>  | <b>Creuzburg</b>    | 51.06 | 10.25 |
| <b>6337514</b>       | <b>Weser</b>   | <b>Intschede</b>         |  | <b>DE</b> | <b>52.964</b>  | <b>9.125</b>   | <b>37720</b>  | <b>4.79</b>    | <b>1857</b> | <b>2016</b> | <b>320.5</b>  | <b>Rotenburg</b>    | 53.13 | 9.34  |
| 6337200              | Weser          | Vlotho                   |  | DE        | 52.176         | 8.862          | 17618         | 41.66          | 1820        | 2016        | 170.7         | Göttingen           | 51.56 | 9.85  |

## Supplementary Figures

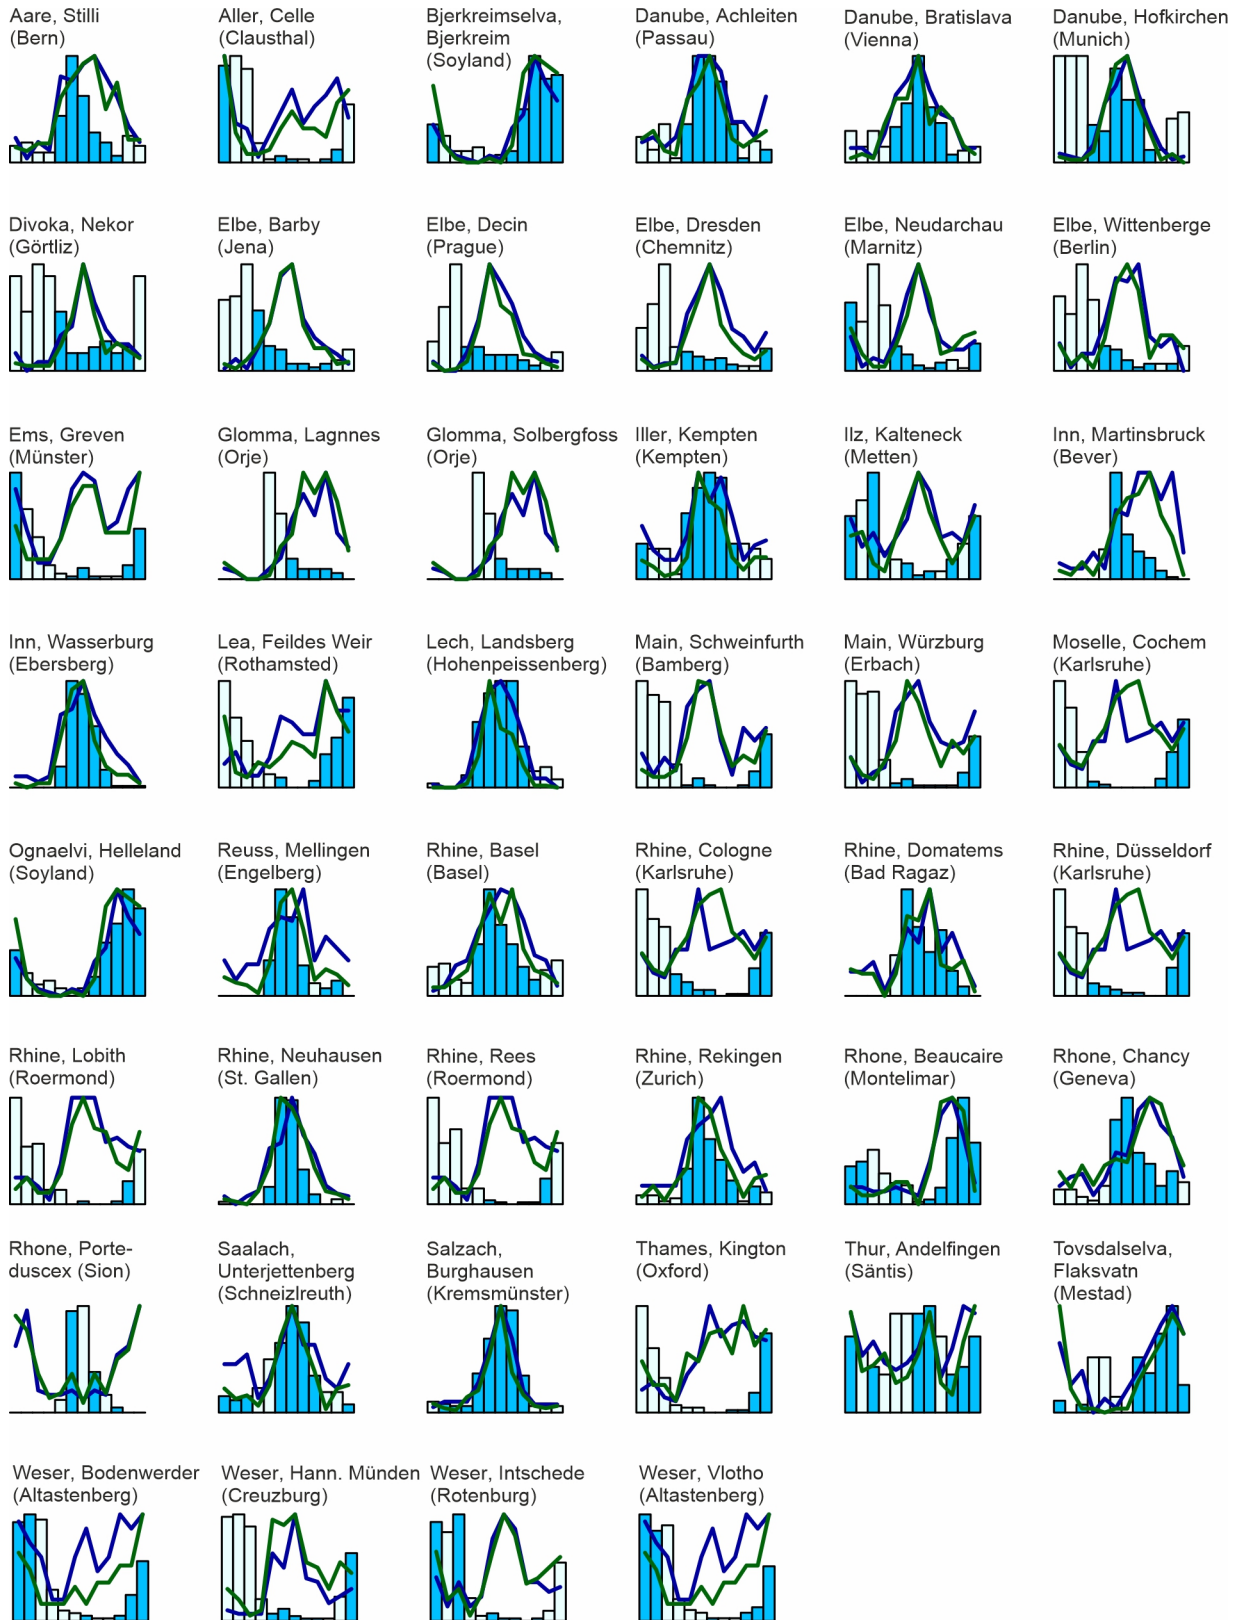

**Fig. S1:** Seasonality of annual peak streamflow (bars), Rx5d (blue) and Rx20day (green). The streamflow bars pertaining to the six months with highest Rx5day are marked in blue. Lines and bars are scaled between 0 and the maximum.

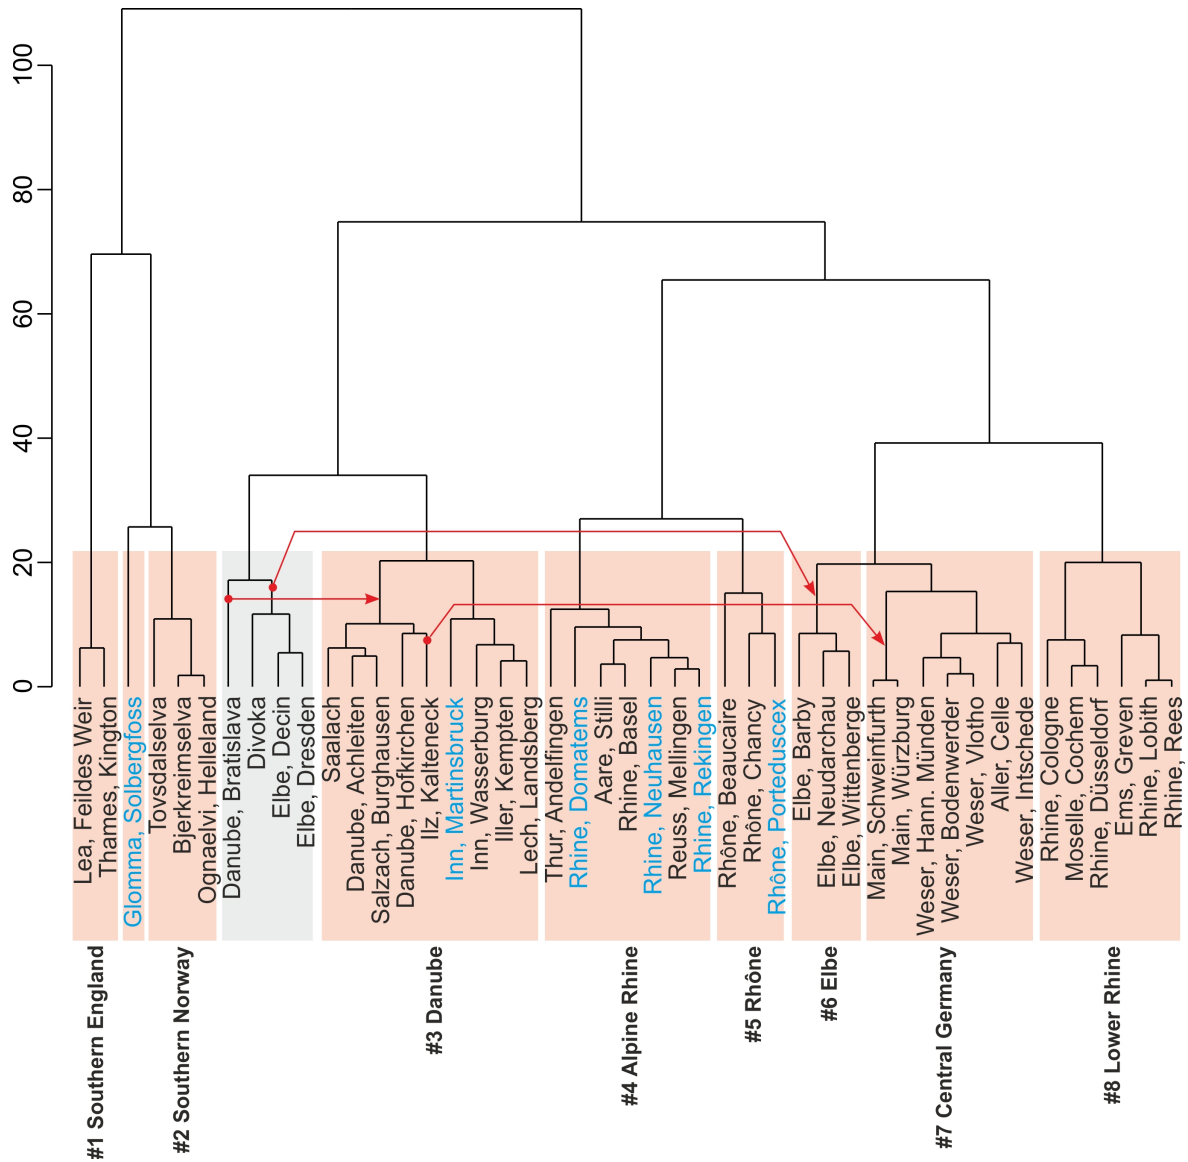

**Fig. S2:** Dendrogram of Ward cluster analysis and chosen regionalization (boxes – the grey cluster was split). Red points and arrows: Streamflow series that were assigned to another cluster (blue: series shown in Fig. 2).

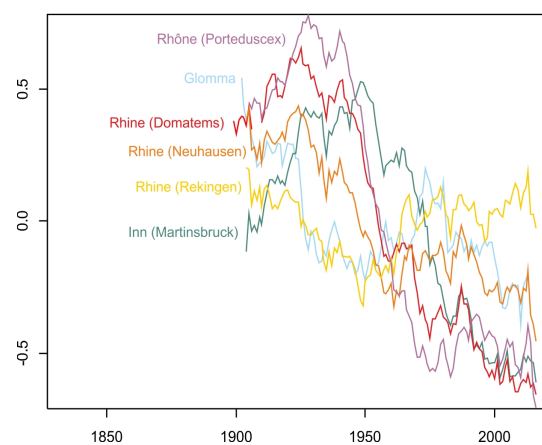

**Fig. S3:** Streamflow series (normalized, smoothed with a 30-yr moving average) that were excluded from the main analysis.

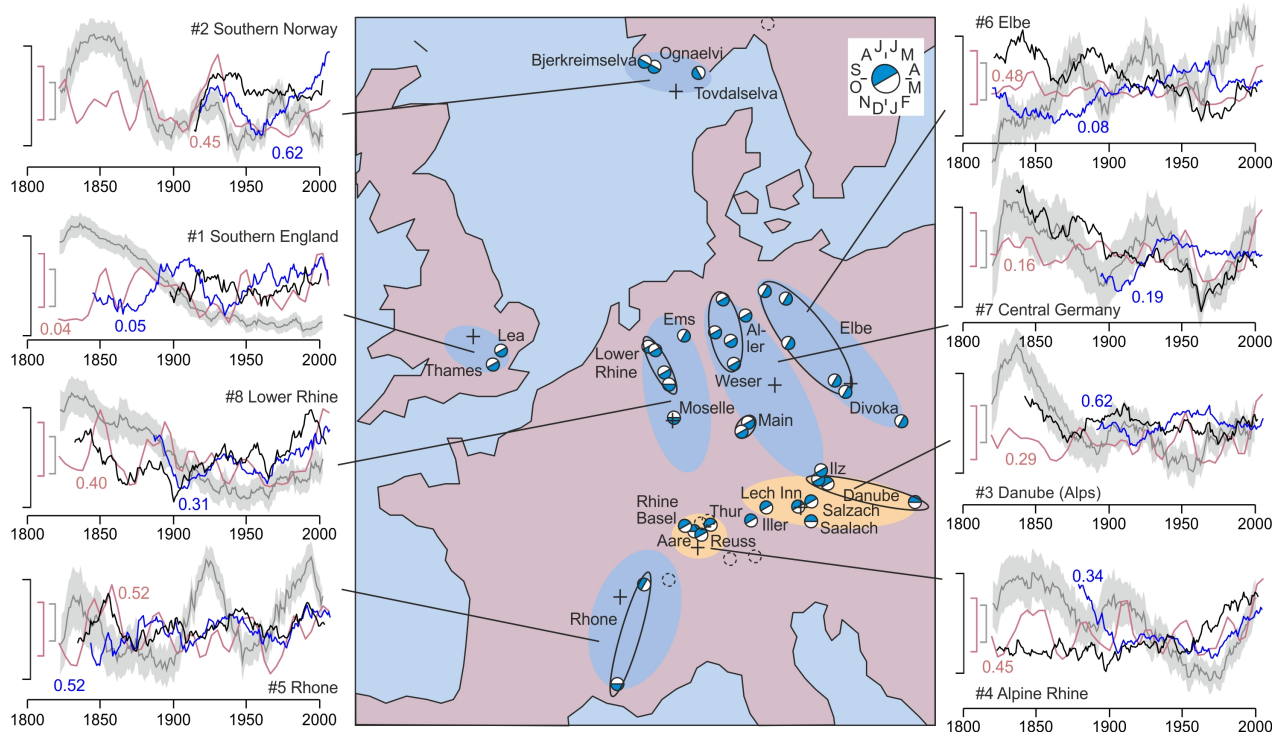

**Figure S4.** Regionally averaged (coloured ellipses; black ellipses indicate same river) series of normalized annual peak streamflow (black), precipitation (blue) and CON5d from 20CRv3 at locations of crosses (grey, shading indicates the ensemble standard deviation), standardized and subsequently smoothed with a 30-yr moving average (black/grey scale bars, ranging from -0.5 to +0.5). Light red lines (scale bar from 1 to 1.5) show interpolated and smoothed flood intensity from Blöschl et al (2020) at the locations of the crosses (numbers: correlations with peak streamflow at 4-yr aggregation). Regions are colour-coded according to the predominance of cold (blue) or warm season floods (orange; the blue part of the white-blue circle for each river indicates the 6-month period with highest flood frequency). Dashed circles: Streamflow series excluded because of likely influence of snow melt on trends.

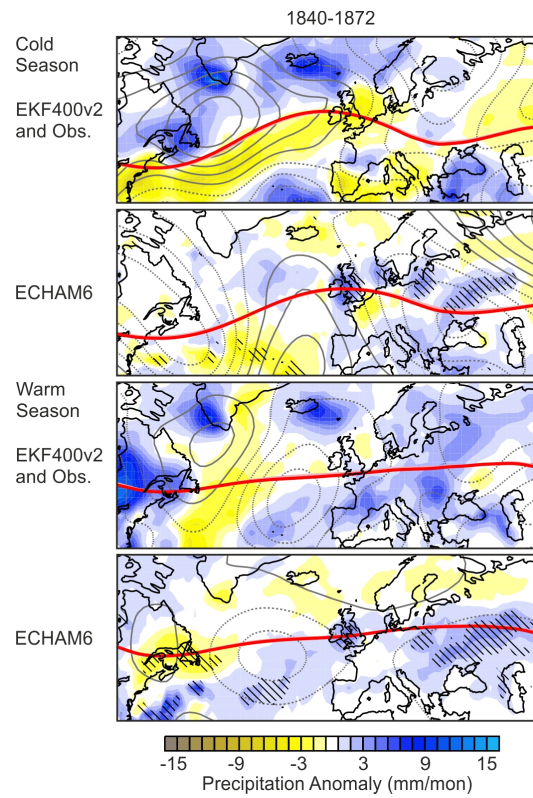

**Fig. S5.** Same as Fig. 8, but for the period 1840-1872. Note that ECHAM6 simulations start only in 1851.
